# Supplementary material for: Relationship between low hemoglobin levels and mortality in patients with septic shock
Source: PubMed Central journal article supplement — Acute Crit Care. 2019 May 31;34(2):141–7. doi: 10.4266/acc.2019.00465 (PMC6786672; doi:10.4266/acc.2019.00465), 2019-05-31
Supplement: acc-2019-00465-suppl.pdf [file acc-2019-00465-suppl.pdf]

**Supplementary Table 1.** ORs for 28-day mortality rates calculated using univariate and multivariate logistics analyses

| Characteristics           | OR (95% CI)         | P-value | Adjusted OR (95% CI) | P-value |
|---------------------------|---------------------|---------|----------------------|---------|
| Age (yr)                  | 1.019 (1.010–1.027) | <0.001  | 1.024 (1.014–1.033)  | <0.001  |
| Female sex                | 0.752 (0.607–0.932) | 0.009   |                      |         |
| Comorbid disease          |                     |         |                      |         |
| Hypertension              | 1.040 (0.843–1.284) | 0.714   |                      |         |
| Diabetes mellitus         | 1.258 (1.009–1.568) | 0.041   |                      |         |
| Cerebrovascular accident  | 1.246 (0.918–1.691) | 0.157   |                      |         |
| Chronic pulmonary disease | 1.930 (1.373–2.713) | <0.001  | 1.999 (1.388–2.880)  | <0.001  |
| Chronic renal disease     | 1.457 (1.017–2.088) | 0.040   |                      |         |
| Laboratory finding        |                     |         |                      |         |
| Hemoglobin (g/dl)         | 0.919 (0.882–0.958) | <0.001  |                      |         |
| Hemoglobin range (g/dl)   |                     |         |                      |         |
| ≥9.0                      | Reference           |         | Reference            |         |
| 8.0–8.9                   | 0.440 (0.288–0.671) | <0.001  | 1.599 (1.126–2.269)  | 0.009   |
| 7.0–7.9                   | 0.699 (0.421–1.163) | 0.168   | 1.368 (0.890–2.103)  | 0.153   |
| <7.0                      | 0.679 (0.388–1.188) | 0.175   | 2.499 (1.590–3.930)  | <0.001  |
| Initial SOFA score        | 1.243 (1.201–1.287) | <0.001  | 1.249 (1.204–1.294)  | <0.001  |
| pRBC transfusion <6 hr    | 0.712 (0.606–0.836) | <0.001  |                      |         |

OR: odds ratio; CI: confidence interval; SOFA: Sequential Organ Failure Assessment; pRBC: packed red blood cell.
